# Supplementary material for: A Review and In Silico Analysis of Tissue and Exosomal Circular RNAs: Opportunities and Challenges in Thyroid Cancer
Source: MDPI journal article supplement (doi:10.3390/cancers14194728), 2022-09-28
Supplement: s1 [file s1]

**Table S1.** Fold change and annotation of differentially expressed cirRNAs in PTC compared to normal thyroid tissues

| circID           | logFC | P     | Derived gene   | chr   | start    | end      | strand | genomic length | spliced seq length |
|------------------|-------|-------|----------------|-------|----------|----------|--------|----------------|--------------------|
| hsa_circ_0013809 | 3.267 | 0.001 | TCONS_00001137 | chr1  | 1.43E+08 | 1.43E+08 | +      | 10928          | 10928              |
| hsa_circ_0010146 | 3.009 | 5E-04 | FBXO42         | chr1  | 16632297 | 16641930 | -      | 9633           | 384                |
| hsa_circ_0011287 | 2.774 | 0.001 | SERINC2        | chr1  | 31901824 | 31902385 | +      | 561            | 233                |
| hsa_circ_0012451 | 2.634 | 0.012 | EPS15          | chr1  | 51926762 | 51938620 | -      | 11858          | 486                |
| hsa_circ_0014700 | 2.606 | 3E-04 | TMEM79         | chr1  | 1.56E+08 | 1.56E+08 | +      | 9531           | 2226               |
| hsa_circ_0040024 | 2.557 | 0.005 | CIRH1A         | chr16 | 69184439 | 69201745 | +      | 17306          | 1863               |
| hsa_circ_0011748 | 2.488 | 0.013 | SF3A3          | chr1  | 38445136 | 38447483 | -      | 2347           | 291                |
| hsa_circ_0014566 | 2.485 | 3E-04 | ASH1L          | chr1  | 1.55E+08 | 1.55E+08 | -      | 5044           | 571                |
| hsa_circ_0014940 | 2.39  | 0.006 | NCSTN          | chr1  | 1.6E+08  | 1.6E+08  | +      | 2658           | 682                |
| hsa_circ_0014387 | 2.342 | 0.002 | UBAP2L         | chr1  | 1.54E+08 | 1.54E+08 | +      | 199            | 199                |
| hsa_circ_0011744 | 2.328 | 0.011 | SF3A3          | chr1  | 38435025 | 38450451 | -      | 15426          | 978                |
| hsa_circ_0012513 | 2.328 | 0.008 | ORC1           | chr1  | 52838500 | 52847433 | -      | 8933           | 925                |
| hsa_circ_0011408 | 2.189 | 3E-04 | HDAC1          | chr1  | 32797074 | 32799224 | +      | 2150           | 1049               |
| hsa_circ_0014917 | 2.133 | 0.004 | COPA           | chr1  | 1.6E+08  | 1.6E+08  | -      | 13339          | 537                |
| hsa_circ_0011707 | 2.079 | 0.01  | GNL2           | chr1  | 38049467 | 38059447 | -      | 9980           | 572                |
| hsa_circ_0013510 | 2.063 | 0.003 | WDR77          | chr1  | 1.12E+08 | 1.12E+08 | -      | 5120           | 426                |
| hsa_circ_0013164 | 2.001 | 3E-04 | EVI5           | chr1  | 93029198 | 93170301 | -      | 141103         | 1837               |
| hsa_circ_0011555 | 2.001 | 8E-04 | ZMYM4          | chr1  | 35854510 | 35855699 | +      | 1189           | 324                |
| hsa_circ_0010492 | 1.979 | 0.021 | EIF4G3         | chr1  | 21377358 | 21377487 | -      | 129            | 129                |
| hsa_circ_0014650 | 1.977 | 6E-04 | ARHGEF2        | chr1  | 1.56E+08 | 1.56E+08 | -      | 684            | 247                |
| hsa_circ_0001067 | 1.95  | 3E-04 | UGGT1          | chr2  | 1.29E+08 | 1.29E+08 | +      | 18451          | 1316               |
| hsa_circ_0011145 | 1.94  | 9E-04 | SNHG3          | chr1  | 28832731 | 28837404 | +      | 4673           | 2204               |
| hsa_circ_0013948 | 1.919 | 0.005 | CHD1L          | chr1  | 1.47E+08 | 1.47E+08 | +      | 13070          | 738                |
| hsa_circ_0014565 | 1.915 | 5E-05 | ASH1L          | chr1  | 1.55E+08 | 1.55E+08 | -      | 89527          | 2335               |
| hsa_circ_0013290 | 1.893 | 0.002 | AGL            | chr1  | 1E+08    | 1E+08    | +      | 7429           | 947                |
| hsa_circ_0012061 | 1.833 | 0.002 | SZT2           | chr1  | 43896619 | 43912839 | +      | 16220          | 4512               |
| hsa_circ_0011967 | 1.807 | 0.007 | PPIH           | chr1  | 43124514 | 43133568 | +      | 9054           | 946                |
| hsa_circ_0001506 | 1.783 | 0.005 | SERINC5        | chr5  | 79505531 | 79506139 | -      | 608            | 608                |
| hsa_circ_0013598 | 1.767 | 1E-05 | PHTF1          | chr1  | 1.14E+08 | 1.14E+08 | -      | 156            | 156                |
| hsa_circ_0040071 | 1.766 | 2E-04 | NFAT5          | chr16 | 69602397 | 69729282 | +      | 126885         | 4647               |
| hsa_circ_0000166 | 1.76  | 0.029 | C1orf27        | chr1  | 1.86E+08 | 1.86E+08 | +      | 12995          | 366                |
| hsa_circ_0012844 | 1.759 | 0.008 | CACHD1         | chr1  | 65016276 | 65068595 | +      | 52319          | 319                |
| hsa_circ_0013038 | 1.756 | 0.001 | FUBP1          | chr1  | 78429746 | 78433350 | -      | 3604           | 791                |
| hsa_circ_0013999 | 1.737 | 0.024 | ANP32E         | chr1  | 1.5E+08  | 1.5E+08  | -      | 5325           | 627                |

|                  |       |       |                   |       |          |          |   |        |       |
|------------------|-------|-------|-------------------|-------|----------|----------|---|--------|-------|
| hsa_circ_0012482 | 1.717 | 0.005 | NRD1              | chr1  | 52299688 | 52299842 | - | 154    | 154   |
| hsa_circ_0011740 | 1.714 | 0.007 | INPP5B            | chr1  | 38397584 | 38406470 | - | 8886   | 252   |
| hsa_circ_0011144 | 1.711 | 8E-04 | SNHG3             | chr1  | 28832454 | 28837404 | + | 4950   | 2346  |
| hsa_circ_0014103 | 1.704 | 0.002 | SEMA6C            | chr1  | 1.51E+08 | 1.51E+08 | - | 89     | 89    |
| hsa_circ_0040008 | 1.698 | 0.004 | TMCO7             | chr16 | 69007930 | 69074324 | + | 66394  | 407   |
| hsa_circ_0014326 | 1.683 | 0.01  | DENND4B           | chr1  | 1.54E+08 | 1.54E+08 | - | 9253   | 2813  |
| hsa_circ_0012034 | 1.68  | 0.003 | SZT2              | chr1  | 43868847 | 43892209 | + | 23362  | 3403  |
| hsa_circ_0010533 | 1.667 | 3E-04 | USP48             | chr1  | 22021558 | 22021714 | - | 156    | 156   |
| hsa_circ_0011031 | 1.648 | 7E-04 | GPATCH3           | chr1  | 27220726 | 27220901 | - | 175    | 175   |
| hsa_circ_0011164 | 1.632 | 2E-04 | YTHDF2            | chr1  | 29063135 | 29096287 | + | 33152  | 3060  |
| hsa_circ_0000585 | 1.593 | 0.037 | SNORD116-19       | chr15 | 25328542 | 25339104 | + | 10562  | 10562 |
| hsa_circ_0014595 | 1.593 | 2E-04 | MSTO1             | chr1  | 1.56E+08 | 1.56E+08 | + | 135    | 135   |
| hsa_circ_0013110 | 1.592 | 0.002 | CCBL2             | chr1  | 89434352 | 89454034 | - | 19682  | 304   |
| hsa_circ_0014760 | 1.583 | 0.035 | IQGAP3            | chr1  | 1.57E+08 | 1.57E+08 | - | 14318  | 1335  |
| hsa_circ_0001594 | 1.577 | 0.031 | HIST1H2AJ         | chr6  | 27775963 | 27782476 | - | 6513   | 6513  |
| hsa_circ_0001175 | 1.569 | 0.035 | YTHDF1            | chr20 | 61826924 | 61827836 | - | 912    | 912   |
| hsa_circ_0010367 | 1.568 | 7E-05 | UBR4              | chr1  | 19503085 | 19503221 | - | 136    | 136   |
| hsa_circ_0014762 | 1.564 | 0.001 | IQGAP3            | chr1  | 1.57E+08 | 1.57E+08 | - | 4132   | 535   |
| hsa_circ_0011873 | 1.559 | 0.002 | CAP1              | chr1  | 40506254 | 40538321 | + | 32067  | 2773  |
| hsa_circ_0010177 | 1.549 | 0.012 | ATP13A2           | chr1  | 17312452 | 17322795 | - | 10343  | 2500  |
| hsa_circ_0015038 | 1.549 | 0.004 | NOS1AP            | chr1  | 1.62E+08 | 1.62E+08 | + | 14837  | 3482  |
| hsa_circ_0013348 | 1.539 | 8E-04 | SLC30A7           | chr1  | 1.01E+08 | 1.01E+08 | + | 10779  | 546   |
| hsa_circ_0013410 | 1.528 | 0.031 | TMEM167B          | chr1  | 1.1E+08  | 1.1E+08  | + | 6152   | 2750  |
| hsa_circ_0014640 | 1.526 | 8E-04 | KIAA0907          | chr1  | 1.56E+08 | 1.56E+08 | - | 12475  | 1228  |
| hsa_circ_0014499 | 1.505 | 4E-04 | THBS3             | chr1  | 1.55E+08 | 1.55E+08 | - | 108    | 108   |
| hsa_circ_0040029 | 1.49  | 0.048 | CIRH1A            | chr16 | 69189773 | 69197081 | + | 7308   | 483   |
| hsa_circ_0001108 | 1.487 | 0.028 | SP140L            | chr2  | 2.31E+08 | 2.31E+08 | + | 81486  | 41507 |
| hsa_circ_0012972 | 1.483 | 0.002 | PIGK              | chr1  | 77554666 | 77620306 | - | 65640  | 3767  |
| hsa_circ_0014475 | 1.483 | 3E-04 | DCST2             | chr1  | 1.55E+08 | 1.55E+08 | - | 2244   | 400   |
| hsa_circ_0011141 | 1.479 | 0.004 | PHACTR4           | chr1  | 28802618 | 28819603 | + | 16985  | 672   |
| hsa_circ_0011695 | 1.455 | 0.042 | LSM10             | chr1  | 36859030 | 36863493 | - | 4463   | 850   |
| hsa_circ_0011655 | 1.444 | 0.031 | EIF2C3            | chr1  | 36505390 | 36520746 | + | 15356  | 632   |
| hsa_circ_0040064 | 1.438 | 0.016 | TERF2             | chr16 | 69404111 | 69406258 | - | 2147   | 508   |
| hsa_circ_0013102 | 1.428 | 0.044 | PKN2              | chr1  | 89237103 | 89237562 | + | 459    | 363   |
| hsa_circ_0013808 | 1.41  | 0.018 | TCONS_l2_00002628 | chr1  | 1.43E+08 | 1.43E+08 | + | 169    | 169   |
| hsa_circ_0010604 | 1.407 | 0.027 | HSPG2             | chr1  | 22159959 | 22201026 | - | 41067  | 7450  |
| hsa_circ_0012220 | 1.399 | 0.023 | TESK2             | chr1  | 45820974 | 45956840 | - | 135866 | 943   |

|                  |       |       |         |       |          |          |   |       |       |
|------------------|-------|-------|---------|-------|----------|----------|---|-------|-------|
| hsa_circ_0012954 | 1.392 | 0.017 | ZRANB2  | chr1  | 71536509 | 71536679 | - | 170   | 170   |
| hsa_circ_0014872 | 1.391 | 0.032 | DCAF8   | chr1  | 1.6E+08  | 1.6E+08  | - | 1222  | 239   |
| hsa_circ_0014268 | 1.387 | 0.023 | ILF2    | chr1  | 1.54E+08 | 1.54E+08 | - | 7789  | 887   |
| hsa_circ_0013307 | 1.38  | 0.011 | SASS6   | chr1  | 1.01E+08 | 1.01E+08 | - | 7529  | 1005  |
| hsa_circ_0040070 | 1.357 | 0.015 | NFAT5   | chr16 | 69602397 | 69693802 | + | 91405 | 1358  |
| hsa_circ_0010445 | 1.353 | 2E-04 | HP1BP3  | chr1  | 21091869 | 21107033 | - | 15164 | 990   |
| hsa_circ_0040048 | 1.352 | 0.002 | VPS4A   | chr16 | 69350127 | 69358946 | + | 8819  | 1915  |
| hsa_circ_0011275 | 1.313 | 0.001 | SERINC2 | chr1  | 31885962 | 31907527 | + | 21565 | 1999  |
| hsa_circ_0012745 | 1.306 | 0.009 | FGGY    | chr1  | 59762624 | 59844509 | + | 81885 | 766   |
| hsa_circ_0010033 | 1.305 | 0.01  | FHAD1   | chr1  | 15708523 | 15719713 | + | 11190 | 11190 |
| hsa_circ_0015037 | 1.292 | 2E-04 | ATF6    | chr1  | 1.62E+08 | 1.62E+08 | + | 71    | 71    |
| hsa_circ_0011777 | 1.226 | 0.002 | MACF1   | chr1  | 39748860 | 39793025 | + | 44165 | 3919  |
| hsa_circ_0011233 | 1.221 | 0.006 | PUM1    | chr1  | 31422979 | 31426828 | - | 3849  | 527   |
| hsa_circ_0002044 | 1.218 | 8E-04 | MTHFD1L | chr6  | 1.51E+08 | 1.51E+08 | + | 2973  | 226   |
| hsa_circ_0010737 | 1.215 | 0.006 | HSPG2   | chr1  | 22188249 | 22205614 | - | 17365 | 2612  |
| hsa_circ_0013417 | 1.206 | 0.019 | CELSR2  | chr1  | 1.1E+08  | 1.1E+08  | + | 10210 | 3745  |
| hsa_circ_0011877 | 1.205 | 0.049 | CAP1    | chr1  | 40531886 | 40535546 | + | 3660  | 469   |
| hsa_circ_0001379 | 1.193 | 0.027 | TERC    | chr3  | 1.96E+08 | 1.96E+08 | - | 147   | 147   |
| hsa_circ_0013998 | 1.191 | 0.011 | ANP32E  | chr1  | 1.5E+08  | 1.5E+08  | - | 8753  | 682   |
| hsa_circ_0014165 | 1.187 | 0.032 | PSMB4   | chr1  | 1.51E+08 | 1.51E+08 | + | 120   | 120   |
| hsa_circ_0010571 | 1.176 | 0.021 | HSPG2   | chr1  | 22157474 | 22176685 | - | 19211 | 4377  |
| hsa_circ_0013056 | 1.174 | 0.042 | CTBS    | chr1  | 85028939 | 85029101 | - | 162   | 162   |
| hsa_circ_0013408 | 1.172 | 0.029 | WDR47   | chr1  | 1.1E+08  | 1.1E+08  | - | 803   | 803   |
| hsa_circ_0014873 | 1.152 | 0.045 | DCAF8   | chr1  | 1.6E+08  | 1.6E+08  | - | 60710 | 24444 |
| hsa_circ_0012021 | 1.135 | 0.013 | CDC20   | chr1  | 43825639 | 43828873 | + | 3234  | 1146  |
| hsa_circ_0010836 | 1.134 | 0.023 | KDM1A   | chr1  | 23397717 | 23408066 | + | 10349 | 885   |
| hsa_circ_0014620 | 1.133 | 0.001 | GON4L   | chr1  | 1.56E+08 | 1.56E+08 | - | 26910 | 3609  |
| hsa_circ_0010191 | 1.126 | 0.003 | RCC2    | chr1  | 17736469 | 17749332 | - | 12863 | 941   |
| hsa_circ_0011356 | 1.123 | 0.02  | TXLNA   | chr1  | 32645344 | 32658031 | + | 12687 | 1148  |
| hsa_circ_0013380 | 1.115 | 0.004 | FNDC7   | chr1  | 1.09E+08 | 1.09E+08 | + | 5725  | 1029  |
| hsa_circ_0013401 | 1.114 | 0.001 | CLCC1   | chr1  | 1.09E+08 | 1.09E+08 | - | 2838  | 350   |
| hsa_circ_0012205 | 1.112 | 0.03  | HECTD3  | chr1  | 45470271 | 45473993 | - | 3722  | 904   |
| hsa_circ_0010542 | 1.108 | 0.019 | HSPG2   | chr1  | 22148736 | 22188608 | - | 39872 | 9508  |
| hsa_circ_0012002 | 1.102 | 0.007 | SLC2A1  | chr1  | 43394880 | 43395706 | - | 826   | 456   |
| hsa_circ_0012424 | 1.099 | 0.011 | EPS15   | chr1  | 51860052 | 51887793 | - | 27741 | 1342  |
| hsa_circ_0015052 | 1.081 | 0.018 | UAP1    | chr1  | 1.63E+08 | 1.63E+08 | + | 189   | 189   |
| hsa_circ_0014433 | 1.07  | 0.007 | ADAR    | chr1  | 1.55E+08 | 1.55E+08 | - | 12760 | 1658  |
| hsa_circ_0013111 | 1.065 | 0.001 | RBMXL1  | chr1  | 89445138 | 89458643 | - | 13505 | 5087  |

|                  |       |       |         |      |          |          |   |       |      |
|------------------|-------|-------|---------|------|----------|----------|---|-------|------|
| hsa_circ_0001401 | 1.063 | 0.026 | TBC1D1  | chr4 | 38022211 | 38029500 | + | 7289  | 330  |
| hsa_circ_0011996 | 1.059 | 0.05  | C1orf50 | chr1 | 43239233 | 43240539 | + | 1306  | 219  |
| hsa_circ_0012598 | 1.055 | 0.023 | TMEM48  | chr1 | 54238001 | 54254869 | - | 16868 | 326  |
| hsa_circ_0014540 | 1.033 | 0.017 | FDPS    | chr1 | 1.55E+08 | 1.55E+08 | + | 1073  | 286  |
| hsa_circ_0010375 | 1.025 | 0.01  | UBR4    | chr1 | 19518974 | 19520051 | - | 1077  | 185  |
| hsa_circ_0014939 | 1.006 | 0.003 | NCSTN   | chr1 | 1.6E+08  | 1.6E+08  | + | 122   | 122  |
| hsa_circ_0014226 | -1.05 | 0.044 | S100A6  | chr1 | 1.54E+08 | 1.54E+08 | - | 1642  | 683  |
| hsa_circ_0012535 | -1.05 | 0.041 | ZCCHC11 | chr1 | 52903891 | 52927288 | - | 23397 | 811  |
| hsa_circ_0011900 | -1.05 | 0.031 | SMAP2   | chr1 | 40874324 | 40875507 | + | 1183  | 165  |
| hsa_circ_0010546 | -1.05 | 0.028 | HSPG2   | chr1 | 22151029 | 22160107 | - | 9078  | 1914 |
| hsa_circ_0010775 | -1.06 | 0.002 | HSPG2   | chr1 | 22211812 | 22213827 | - | 2015  | 252  |
| hsa_circ_0012862 | -1.06 | 0.016 | JAK1    | chr1 | 65301078 | 65330655 | - | 29577 | 2379 |
| hsa_circ_0012442 | -1.25 | 0.025 | EPS15   | chr1 | 51875206 | 51913807 | - | 38601 | 714  |
| hsa_circ_0013455 | -1.27 | 0.019 | PSMA5   | chr1 | 1.1E+08  | 1.1E+08  | - | 16532 | 674  |
| hsa_circ_0011689 | -1.35 | 0.048 | STK40   | chr1 | 36814300 | 36824423 | - | 10123 | 627  |
| hsa_circ_0011120 | -1.39 | 0.026 | EYA3    | chr1 | 28362054 | 28369161 | - | 7107  | 284  |
| hsa_circ_0013454 | -1.42 | 0.017 | PSMA5   | chr1 | 1.1E+08  | 1.1E+08  | - | 5436  | 552  |
| hsa_circ_0014348 | -1.43 | 0.005 | CREB3L4 | chr1 | 1.54E+08 | 1.54E+08 | + | 1222  | 835  |
| hsa_circ_0011213 | -1.45 | 0.042 | PUM1    | chr1 | 31404352 | 31418330 | - | 13978 | 2416 |
| hsa_circ_0010395 | -1.5  | 0.024 | MRTO4   | chr1 | 19583557 | 19586622 | + | 3065  | 1827 |
| hsa_circ_0012226 | -1.57 | 0.041 | AKR1A1  | chr1 | 46018107 | 46018235 | + | 128   | 128  |
| hsa_circ_0010777 | -1.67 | 9E-04 | HSPG2   | chr1 | 22216473 | 22216978 | - | 505   | 220  |
| hsa_circ_0010832 | -1.69 | 0.02  | KDM1A   | chr1 | 23395031 | 23410184 | + | 15153 | 1779 |
| hsa_circ_0011969 | -1.77 | 0.01  | PPIH    | chr1 | 43124898 | 43142429 | + | 17531 | 599  |
| hsa_circ_0000031 | -1.83 | 0.034 | RPL11   | chr1 | 24019108 | 24020403 | + | 1295  | 248  |
| hsa_circ_0014161 | -1.84 | 0.014 | PSMB4   | chr1 | 1.51E+08 | 1.51E+08 | + | 592   | 199  |
| hsa_circ_0012171 | -1.99 | 0.047 | RPS8    | chr1 | 45241245 | 45243461 | + | 2216  | 410  |
| hsa_circ_0000104 | -2.18 | 0.036 | CD53    | chr1 | 1.11E+08 | 1.11E+08 | + | 266   | 266  |
